# Supplementary material
Source: Springer Nature journal article supplement (https://www.springermedizin.de/resource/supplementary/13054_2013_3027_MOESM2_ESM.pdf/9712430)

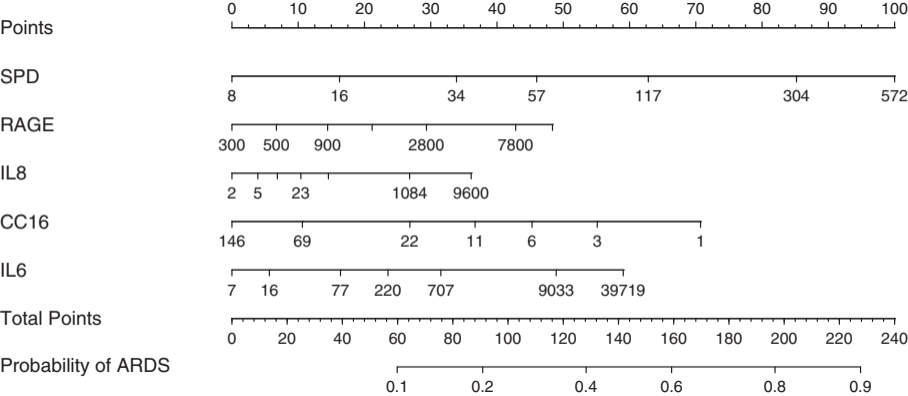

Supplement: MOESM2 [file 9712430]
